# Supplementary material
Source: Springer Nature journal article supplement (https://www.springermedizin.de/resource/supplementary/12931_2013_1418_MOESM1_ESM.pdf/9425946)

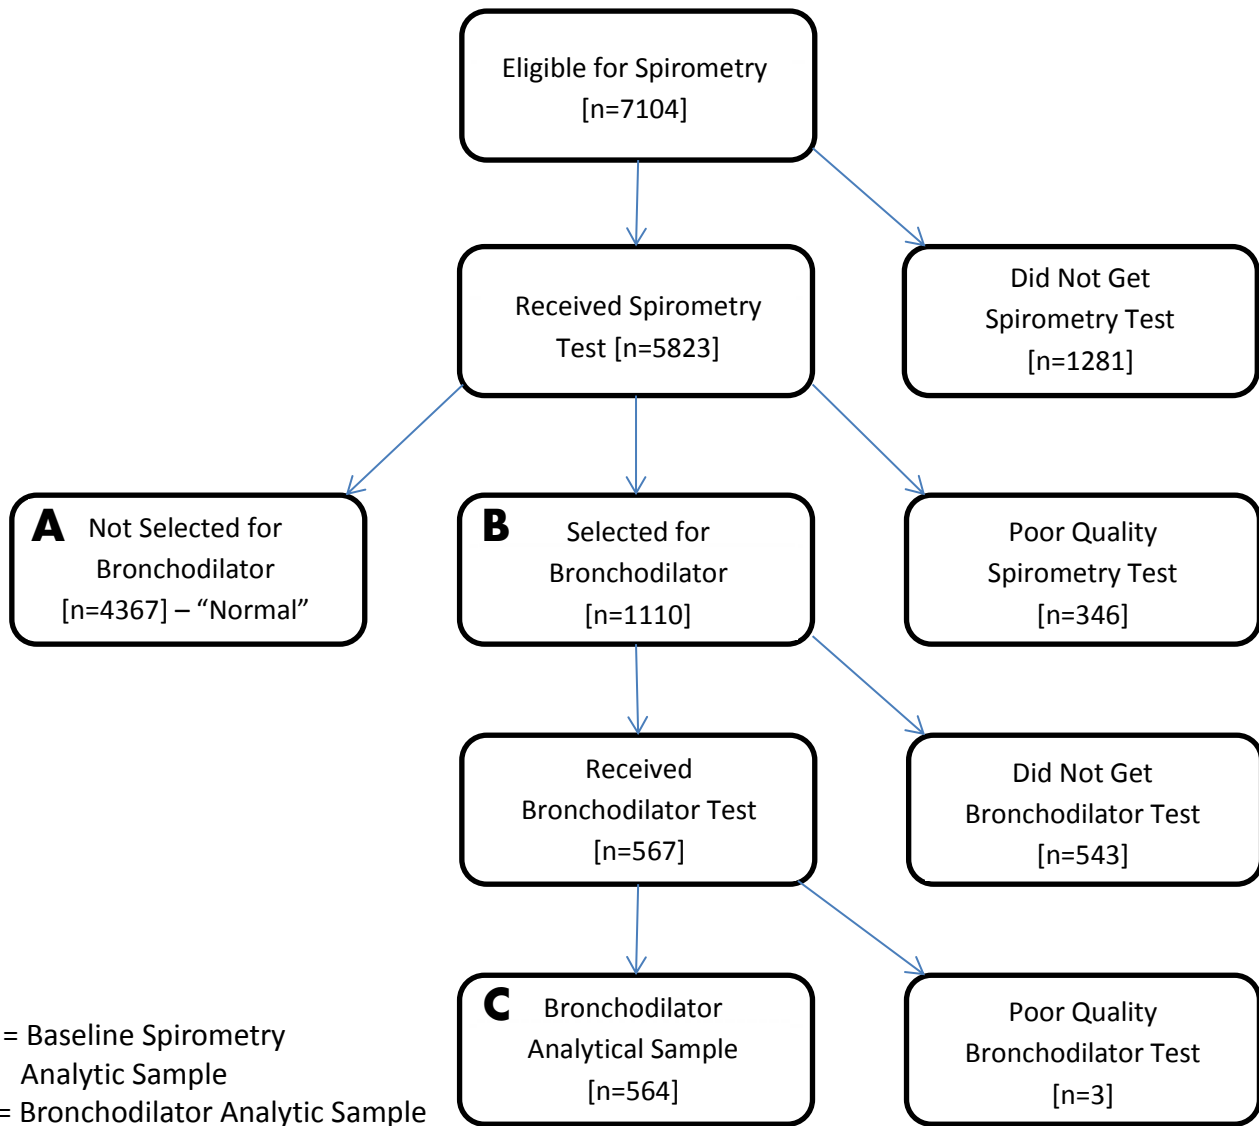

**A+B** = Baseline Spirometry Analytic Sample

**C** = Bronchodilator Analytic Sample

Supplement: MOESM1 [file 9425946]
